# Supplementary material
Source: PubMed Central journal article supplement (PMC10214174)
Supplement: jamaoncol-e231007-s003.pdf [file jamaoncol-e231007-s003.pdf]

## Supplemental Online Content

Holloway RW, Mendivil AA, Kendrick JE, et al. Clinical activity of olvimulogene nanivacirepvec–primed immunochemotherapy in heavily pretreated patients with platinum-resistant or platinum-refractory ovarian cancer: the nonrandomized phase 2 VIRO-15 clinical trial. *JAMA Oncol*. Published online May 25, 2023. doi:10.1001/jamaoncol.2023.1007

**eFigure.** Kaplan-Meier Estimate of Overall Survival

**eTable 1.** Patient Demographic and Clinical Characteristics

**eTable 2.** Adverse Events

This supplemental material has been provided by the authors to give readers additional information about their work.

Oncolytic Viral Immunotherapy in Ovarian Cancer

**eFigure 1. Kaplan-Meier Estimate of Overall Survival (OS)**

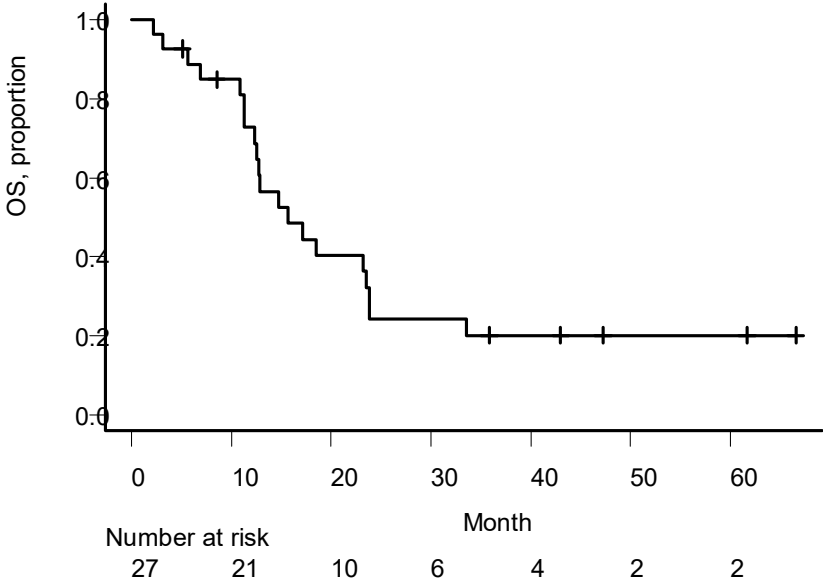

## Oncolytic Viral Immunotherapy in Ovarian Cancer

eTable 1. Patient Demographic and Clinical Characteristics

| Baseline Characteristics                                                                                                                               | Patients (n = 27)          |
|--------------------------------------------------------------------------------------------------------------------------------------------------------|----------------------------|
| Age, median (range), year                                                                                                                              | 62 (35-78)                 |
| <b>Histology</b>                                                                                                                                       |                            |
| High-grade serous                                                                                                                                      | 25 (92%)                   |
| Intermediate-grade serous                                                                                                                              | 1 (4%)                     |
| Mixed                                                                                                                                                  | 1 (4%)                     |
| <b>Clinical stage</b>                                                                                                                                  |                            |
| III                                                                                                                                                    | 1 (4%)                     |
| IIIA                                                                                                                                                   | 1 (4%)                     |
| IIIB                                                                                                                                                   | 4 (15%)                    |
| IIIC                                                                                                                                                   | 17 (62%)                   |
| IV                                                                                                                                                     | 4 (15%)                    |
| <b>ECOG performance status</b>                                                                                                                         |                            |
| 0                                                                                                                                                      | 17 (63%)                   |
| 1                                                                                                                                                      | 10 (37%)                   |
| <b>BMI<sup>a</sup>, median (range), kg/m<sup>2</sup></b>                                                                                               | 23.3 (18.6-47.6)           |
| <b>PNI<sup>a,b</sup>, median (range)</b>                                                                                                               | 43.8 (32.0-56.8)           |
| <b>Prior number of lines, median (range)</b>                                                                                                           | 4 (2-9)                    |
| <b>Prior platinum lines, median (range)</b>                                                                                                            | 2 (1-5)                    |
| <b>Time from the last dose of the most recent platinum regimen to initiation of platinum-based therapy in this study, median (range), [95% CI], mo</b> | 9.9 (2.4-45.1), [9.2-17.0] |
| <b>Platinum status at enrollment</b>                                                                                                                   |                            |
| Platinum-resistant                                                                                                                                     | 14 (52%)                   |
| Platinum-refractory                                                                                                                                    | 13 (48%)                   |
| <b>Prior therapy with bevacizumab</b>                                                                                                                  |                            |
| Yes                                                                                                                                                    | 22 (81%)                   |
| No                                                                                                                                                     | 5 (19%)                    |
| <b>Prior PARP inhibitor therapy</b>                                                                                                                    |                            |
| Yes                                                                                                                                                    | 20 (74%)                   |
| No                                                                                                                                                     | 7 (26%)                    |
| <b>Prior radiation therapy</b>                                                                                                                         |                            |
| Yes                                                                                                                                                    | 5 (19%)                    |
| No                                                                                                                                                     | 22 (81%)                   |
| <b>Baseline genetic profiles</b>                                                                                                                       |                            |
| <b>Tumor PD-L1 expression</b>                                                                                                                          |                            |
| Positive                                                                                                                                               | 1 (4%)                     |
| Negative                                                                                                                                               | 25 (92%)                   |
| Unknown                                                                                                                                                | 1 (4%)                     |
| <b>Germline or somatic BRCA1/2 mutations</b>                                                                                                           |                            |
| Germline                                                                                                                                               | 4 (15%)                    |
| Somatic                                                                                                                                                | 4 (15%)                    |
| Negative                                                                                                                                               | 19 (70%)                   |
| <b>Microsatellite instability (MSI) status</b>                                                                                                         |                            |
| Stable                                                                                                                                                 | 19 (70%)                   |
| Unknown                                                                                                                                                | 8 (30%)                    |
| <b>Tumor mutational load</b>                                                                                                                           |                            |
| Low                                                                                                                                                    | 13 (48%)                   |

## Oncolytic Viral Immunotherapy in Ovarian Cancer

|                     |          |
|---------------------|----------|
| <b>Intermediate</b> | 4 (15%)  |
| <b>Unknown</b>      | 10 (37%) |

Abbreviations: BMI, body mass index; BRCA, BReast CAncer gene; CA, cancer antigen; CI, confidence interval; CT, computed tomography; ECOG, Eastern Cooperative Oncology Group; months (mo); ORR, objective response rate; PARP, poly-adenosine diphosphate-ribose polymerase; PFS, progression-free survival; PNI, prognostic nutritional index; PD-L1, programmed death ligand-1.

<sup>a</sup>BMI and PNI were recorded to provide insight on nutritional and immune status.

<sup>b</sup>PNI was calculated using the formula:  $PNI = 10 \times \text{serum albumin value (g/dL)} + 0.005 \times \text{absolute lymphocyte count (per mm}^3\text{)}$ .

## Oncolytic Viral Immunotherapy in Ovarian Cancer

eTable 2.

## A. Treatment-Related Adverse Events (TRAEs) Related to Olvi-Vec

| Incidence of TRAEs Occurring in $\geq 2$ patients, n (%) |           |           |                      |         |
|----------------------------------------------------------|-----------|-----------|----------------------|---------|
| TRAEs <sup>1</sup>                                       | Any Grade | Grade 1-2 | Grade 3              | Grade 4 |
| Any TRAEs                                                | 26 (96.3) | 26 (96.3) | 4 (14.8)             | 0 (0)   |
| Pyrexia                                                  | 17 (63.0) | 16 (59.3) | 1 (3.7)              | 0 (0)   |
| Abdominal Pain                                           | 14 (51.9) | 12 (44.4) | 2 (7.4) <sup>2</sup> | 0 (0)   |
| Nausea                                                   | 13 (48.1) | 13 (48.1) | 0 (0)                | 0 (0)   |
| Abdominal Distension                                     | 11 (40.7) | 11 (40.7) | 0 (0)                | 0 (0)   |
| Rigors                                                   | 10 (37.0) | 10 (37.0) | 0 (0)                | 0 (0)   |
| Fatigue                                                  | 10 (37.0) | 9 (33.3)  | 1 (3.7) <sup>2</sup> | 0 (0)   |
| Muscular Weakness                                        | 7 (25.9)  | 7 (25.9)  | 0 (0)                | 0 (0)   |
| Vomiting                                                 | 7 (25.9)  | 7 (25.9)  | 0 (0)                | 0 (0)   |
| Generalized Pain                                         | 6 (22.2)  | 6 (22.2)  | 0 (0)                | 0 (0)   |
| Anorexia                                                 | 4 (14.8)  | 3 (11.1)  | 1 (3.7) <sup>2</sup> | 0 (0)   |
| Headache                                                 | 4 (14.8)  | 4 (14.8)  | 0 (0)                | 0 (0)   |
| Dehydration                                              | 3 (11.1)  | 3 (11.1)  | 0 (0)                | 0 (0)   |

<sup>1</sup> All adverse events (AEs) were classified using the MedDRA v19, and were graded according to the National Cancer Institute Common Terminology Criteria for Adverse Events v4.03. TRAEs were defined as AEs determined to have a degree of attribution to Olvi-Vec, with an onset date on or after the date of first Olvi-Vec dose until 28 days after the second Olvi-Vec dose. Patients with multiple reports of same adverse event, most severe included. No deaths related to Olvi-Vec treatment; No discontinuation due to TRAEs.

<sup>2</sup> One patient experienced a serious adverse event.

B. Adverse Events (AEs) Related to Subsequent Platinum-based Chemotherapy  $\pm$  Bevacizumab

| Incidence of AEs Occurring in $\geq 2$ Patients |           |           |          |         |
|-------------------------------------------------|-----------|-----------|----------|---------|
| Patients, n (%): N=27                           | Any Grade | Grade 1-2 | Grade 3  | Grade 4 |
| Any AEs                                         | 23 (85.1) | 23 (85.1) | 7 (25.9) | 2 (7.4) |
| Nausea                                          | 9 (33.3)  | 8 (29.6)  | 1 (3.7)  | 0 (0.0) |
| Vomiting                                        | 8 (29.6)  | 8 (29.6)  | 0 (0.0)  | 0 (0.0) |
| Fatigue                                         | 7 (25.9)  | 7 (25.9)  | 0 (0.0)  | 0 (0.0) |
| Diarrhea                                        | 6 (22.2)  | 6 (22.2)  | 0 (0.0)  | 0 (0.0) |
| Hypertension                                    | 6 (22.2)  | 4 (14.8)  | 2 (7.4)  | 0 (0.0) |
| Platelet count decreased                        | 6 (22.2)  | 3 (11.1)  | 1 (3.7)  | 2 (7.4) |
| Anemia                                          | 5 (18.5)  | 2 (7.4)   | 3 (11.1) | 0 (0.0) |
| Headache                                        | 5 (18.5)  | 5 (18.5)  | 0 (0.0)  | 0 (0.0) |
| Asthenia                                        | 3 (11.1)  | 3 (11.1)  | 0 (0.0)  | 0 (0.0) |
| Constipation                                    | 3 (11.1)  | 3 (11.1)  | 0 (0.0)  | 0 (0.0) |
| Dehydration                                     | 3 (11.1)  | 2 (7.4)   | 1 (3.7)  | 0 (0.0) |
| Hypomagnesemia                                  | 3 (11.1)  | 3 (11.1)  | 0 (0.0)  | 0 (0.0) |
| Infusion related reaction                       | 3 (11.1)  | 3 (11.1)  | 0 (0.0)  | 0 (0.0) |
| Alopecia                                        | 2 (7.4)   | 2 (7.4)   | 0 (0.0)  | 0 (0.0) |

## Oncolytic Viral Immunotherapy in Ovarian Cancer

|                                                                           |         |         |         |         |
|---------------------------------------------------------------------------|---------|---------|---------|---------|
| <b>Arthralgia</b>                                                         | 2 (7.4) | 2 (7.4) | 0 (0.0) | 0 (0.0) |
| <b>Decreased Appetite</b>                                                 | 2 (7.4) | 2 (7.4) | 0 (0.0) | 0 (0.0) |
| <b>Dizziness</b>                                                          | 2 (7.4) | 2 (7.4) | 0 (0.0) | 0 (0.0) |
| <b>Dysgeusia</b>                                                          | 2 (7.4) | 2 (7.4) | 0 (0.0) | 0 (0.0) |
| <b>Epistaxis</b>                                                          | 2 (7.4) | 2 (7.4) | 0 (0.0) | 0 (0.0) |
| <b>Hypokalemia</b>                                                        | 2 (7.4) | 2 (7.4) | 0 (0.0) | 0 (0.0) |
| <b>Hyponatremia</b>                                                       | 2 (7.4) | 2 (7.4) | 0 (0.0) | 0 (0.0) |
| <b>Neuropathy</b>                                                         | 2 (7.4) | 2 (7.4) | 0 (0.0) | 0 (0.0) |
| <b>Rhinorrhea</b>                                                         | 2 (7.4) | 2 (7.4) | 0 (0.0) | 0 (0.0) |
| <b>*All AEs reported with any grade based on worst grade per patient.</b> |         |         |         |         |

Oncolytic Viral Immunotherapy in Ovarian Cancer

**Data Sharing Statement**

Holloway. Phase 2 VIRO-15 Trial of Olvi-Vec-Primed Immunotherapy in Heavily Pretreated Patients with Platinum-Resistant or -Refractory Ovarian Cancer. *JAMA Oncol.* Published xx. Doi:xxx

**Data**

**Data available:** Yes

**Data types:** Deidentified participant data

**How to access data:** [robhollowaymd@gmail.com](mailto:robhollowaymd@gmail.com)

**When available:** With publication

**Supporting Documents**

**Document types:** None

**Additional Information**

**Who can access the data:** Researchers whose proposed use of the data has been approved

**Types of analyses:** For a specified approved purpose

**Mechanisms of data availability:** After approval of a proposal
