# Supplementary material
Source: PubMed Central journal article supplement (PMC10214174)
Supplement: jamaoncol-e231007-s004.pdf [file jamaoncol-e231007-s004.pdf]

## Data Sharing Statement

Holloway. Clinical Activity of Olvi-Vec–Primed Immunochemotherapy in Heavily-Pretreated Patients with Platinum-Resistant or -Refractory Ovarian Cancer. *JAMA Oncol.* Published May 25, 2023. doi:10.1001/jamaoncol.2023.1007

### Data

**Data available:** Yes

**Data types:** Deidentified participant data

**How to access data:** [robhollowaymd@gmail.com](mailto:robhollowaymd@gmail.com) and [sarfraz.ahmad@adventhealth.com](mailto:sarfraz.ahmad@adventhealth.com)

**When available:** With publication

### Supporting Documents

**Document types:** None

### Additional Information

**Who can access the data:** Anyone requesting the data.

**Types of analyses:** For any purpose.

**Mechanisms of data availability:** With investigator support.

**Any additional restrictions:** None.
